# Supplementary material for: Optimising an Infusion Protocol Containing Cefepime to Limit Particulate Load to Newborns in a Neonatal Intensive Care Unit
Source: Pharmaceutics. 2021 Mar 8;13(3):351. doi: 10.3390/pharmaceutics13030351 (PMC8001063; doi:10.3390/pharmaceutics13030351)
Supplement: Supplementary file 1 [file pharmaceutics-13-00351-s001.pdf]

# Supplementary Materials: Optimising an Infusion Protocol Containing Cefepime to Limit Particulate Load to Newborns in a Neonatal Intensive Care Unit

Anthony Martin Mena, Morgane Masse, Laura Négrier, Thu Huong Nguyen, Bruno Ladam, Laurent Storme, Christine Barthélémy, Pascal Odou, Stéphanie Genay and Bertrand Décaudin

**Table S1.** Number of particles  $\geq 2 \mu\text{m}$ ,  $\geq 5 \mu\text{m}$ ,  $\geq 10 \mu\text{m}$ ,  $\geq 15 \mu\text{m}$ ,  $\geq 25 \mu\text{m}$  and total for both infusion sets over the period T0-T8H. Results are expressed as medians [minimum; maximum] (Mann-Whitney test,  $p < 0.05$ ,  $n = 6$ ).

| Particles T0-T8H      | CEF Infusion Set           | CAF Infusion Set    | P      |
|-----------------------|----------------------------|---------------------|--------|
| $\geq 2 \mu\text{m}$  | 56,465<br>[22,352–68,051]  | 2391<br>[990–3145]  | 0.0022 |
| $\geq 5 \mu\text{m}$  | 9794<br>[3087–17,064]      | 383<br>[227–852]    | 0.0022 |
| $\geq 10 \mu\text{m}$ | 1238<br>[338–1884]         | 127<br>[14–189]     | 0.0022 |
| $\geq 15 \mu\text{m}$ | 342<br>[83–526]            | 43<br>[1–58]        | 0.0022 |
| $\geq 25 \mu\text{m}$ | 59<br>[14–64]              | 3<br>[0–33]         | 0.0043 |
| Total                 | 89,389<br>[44,763–104,972] | 4982<br>[1609–6159] | 0.0022 |

**Table S2.** Number of particles  $\geq 2 \mu\text{m}$ ,  $\geq 5 \mu\text{m}$ ,  $\geq 10 \mu\text{m}$ ,  $\geq 15 \mu\text{m}$ ,  $\geq 15 \mu\text{m}$ ,  $\geq 25 \mu\text{m}$  and total for both infusion sets over the period T4H-T5H. Results are expressed as medians [minimum; maximum] (Mann-Whitney test,  $p < 0.05$ ,  $n = 6$ ).

| Particles T4H-T5H     | CEF Infusion Set           | CAF Infusion Set   | P      |
|-----------------------|----------------------------|--------------------|--------|
| $\geq 2 \mu\text{m}$  | 55,141<br>[19,641–66,060]  | 817<br>[215–2230]  | 0.0022 |
| $\geq 5 \mu\text{m}$  | 9475<br>[2028–16,688]      | 136<br>[58–665]    | 0.0022 |
| $\geq 10 \mu\text{m}$ | 1168<br>[327–1837]         | 19<br>[2–189]      | 0.0022 |
| $\geq 15 \mu\text{m}$ | 331<br>[81–516]            | 6<br>[0–50]        | 0.0022 |
| $\geq 25 \mu\text{m}$ | 58<br>[14–64]              | 1<br>[0–4]         | 0.0022 |
| Total                 | 86,246<br>[40,160–100,874] | 1760<br>[376–4544] | 0.0022 |

**Table S3.** Number of particles  $\geq 2 \mu\text{m}$ ,  $\geq 5 \mu\text{m}$ ,  $\geq 10 \mu\text{m}$ ,  $\geq 15 \mu\text{m}$ ,  $\geq 25 \mu\text{m}$  and total for both infusion sets over the period T0-T8H. Results are expressed as medians [minimum; maximum] (Mann-Whitney test,  $p < 0.05$ ,  $n = 6$ ).

| Particles T0-T8H      | CEF Infusion Set with Vancomycin | CEF Infusion Set without Vancomycin | P      |
|-----------------------|----------------------------------|-------------------------------------|--------|
| $\geq 2 \mu\text{m}$  | 56,465<br>[22,352–68,051]        | 55,710<br>[38,181–88,563]           | 0.9372 |
| $\geq 5 \mu\text{m}$  | 9794<br>[3087–17,064]            | 13,874<br>[10,237–23,064]           | 0.0931 |
| $\geq 10 \mu\text{m}$ | 1238<br>[338–1 884]              | 1426<br>[1305–2274]                 | 0.0649 |
| $\geq 15 \mu\text{m}$ | 342<br>[83–526]                  | 552<br>[349–938]                    | 0.0649 |
| $\geq 25 \mu\text{m}$ | 59<br>[14–64]                    | 74<br>[27–249]                      | 0.5887 |
| Total                 | 89,389<br>[44,763–104,972]       | 80,315<br>[60,218–125,714]          | 0.6991 |

**Table S4.** Number of particles  $\geq 2 \mu\text{m}$ ,  $\geq 5 \mu\text{m}$ ,  $\geq 10 \mu\text{m}$ ,  $\geq 15 \mu\text{m}$ ,  $\geq 25 \mu\text{m}$  and total for both infusion sets over the period T4H-T5H. Results are expressed as medians [minimum; maximum] (Mann-Whitney test,  $p < 0.05$ ,  $n = 6$ ).

| Particles T4H-T5H     | CEF Infusion Set with Vancomycin | CEF Infusion Set without Vancomycin | P       |
|-----------------------|----------------------------------|-------------------------------------|---------|
| $\geq 2 \mu\text{m}$  | 55,141<br>[19,641–66,060]        | 53,449<br>[36,624–85,663]           | >0.9999 |
| $\geq 5 \mu\text{m}$  | 9,475<br>[2,028–16,688]          | 13,495<br>[9,819–22,646]            | 0.0931  |
| $\geq 10 \mu\text{m}$ | 1,168<br>[327–1,837]             | 1,321<br>[1,141–2,183]              | 0.1797  |
| $\geq 15 \mu\text{m}$ | 331<br>[81–516]                  | 528<br>[348–887]                    | 0.0649  |
| $\geq 25 \mu\text{m}$ | 58<br>[14–64]                    | 74<br>[27–222]                      | 0.4545  |
| Total                 | 86,246<br>[40,160–100,874]       | 77,000<br>[58,118–121,362]          | 0.8182  |

**Table S5.** Number of particles  $\geq 2 \mu\text{m}$ ,  $\geq 5 \mu\text{m}$ ,  $\geq 10 \mu\text{m}$ ,  $\geq 15 \mu\text{m}$ ,  $\geq 25 \mu\text{m}$  and total on CEF infusion sets with and without filter on the emergency route over the period T0-T8H. Results are expressed as medians [minimum; maximum] (Mann-Whitney test,  $p < 0.05$ ,  $n = 6$ ).

| Particles T0-T8H      | CEF Infusion Set without Filter | CEF Infusion Set with Filter | P      |
|-----------------------|---------------------------------|------------------------------|--------|
| $\geq 2 \mu\text{m}$  | 56,465<br>[22,352–68,051]       | 1541<br>[220–2360]           | 0.0022 |
| $\geq 5 \mu\text{m}$  | 9794<br>[3087–17,064]           | 291<br>[71–657]              | 0.0022 |
| $\geq 10 \mu\text{m}$ | 1238<br>[338–1884]              | 22<br>[8–46]                 | 0.0022 |
| $\geq 15 \mu\text{m}$ | 342<br>[83–526]                 | 8<br>[1–20]                  | 0.0022 |
| $\geq 25 \mu\text{m}$ | 59<br>[14–64]                   | 3<br>[0–12]                  | 0.0022 |
| Total                 | 89,389<br>[44,763–104,972]      | 2254<br>[322–3,642]          | 0.0022 |

**Table S6.** Number of particles  $\geq 2 \mu\text{m}$ ,  $\geq 5 \mu\text{m}$ ,  $\geq 10 \mu\text{m}$ ,  $\geq 15 \mu\text{m}$ ,  $\geq 25 \mu\text{m}$  and total on CEF infusion sets with and without filter on the emergency route over the period T4H-T5H. Results are expressed as medians [minimum; maximum] (Mann-Whitney test,  $p < 0.05$ ,  $n = 6$ ).

| Particles<br>T4H-T5H  | CEF Infusion Set without Filter | CEF Infusion Set with Filter | P      |
|-----------------------|---------------------------------|------------------------------|--------|
| $\geq 2 \mu\text{m}$  | 55,141<br>[19,641–6060]         | 296<br>[57–681]              | 0.0022 |
| $\geq 5 \mu\text{m}$  | 9475<br>[2028–16,688]           | 44<br>[31–238]               | 0.0022 |
| $\geq 10 \mu\text{m}$ | 1168<br>[327–1837]              | 13<br>[1–25]                 | 0.0022 |
| $\geq 15 \mu\text{m}$ | 331<br>[81–516]                 | 3<br>[1–17]                  | 0.0022 |
| $\geq 25 \mu\text{m}$ | 58<br>[14–64]                   | 1<br>[0–12]                  | 0.0022 |
| Total                 | 86,246<br>[40,160–100,874]      | 475<br>[85–988]              | 0.0022 |
